# Supplementary material
Source: PubMed Central journal article supplement (PMC4499121)
Supplement: supp_gkv308_nar-00030-n-2015-File006.pdf [file supp_gkv308_nar-00030-n-2015-File006.pdf]

Large Scale Analysis of the Mutational Landscape in  
HT-SELEX Improves Aptamer Discovery  
**Online Supplementary Materials**

Jan Hoinka<sup>1</sup>, Alexey Berezhnoy<sup>2</sup>, Phuong Dao<sup>1</sup>, Zuben E. Sauna<sup>3</sup>, Eli Gilboa<sup>2</sup>, and  
Teresa M. Przytycka<sup>1</sup>

<sup>1</sup> National Center of Biotechnology Information, National Library of Medicine,  
NIH, Bethesda MD 20894, USA, przytyck@ncbi.nlm.nih.gov

<sup>2</sup>Department of Microbiology & Immunology, University of Miami Miller School of  
Medicine, Miami, Florida 33101, USA

<sup>3</sup>Laboratory of Hemostasis, Division of Hematology, Center for Biologics Evaluation  
and Research, Food and Drug Administration, Silver Spring Maryland, 20993 USA

# Supplementary Note 1: AptaCluster Details

The mathematical description below follows the preliminary conference report [1].

## Data Representation

Each selection round is represented as an associative array with keys corresponding to the species in the pool and values representing their respective frequency counts. This operation scales linearly with  $N$ , the number of sequences in the pool. An aptamer  $s = (s_i)_{i=1}^n$ , with a randomized region of length  $n$ , is formally described by the sequence of nucleotides  $s_i$  over the alphabet  $\Omega = \{A, C, G, T\}$  where the index  $i$  corresponds to the  $i$ -th position of the nucleotide sequence. Furthermore, let the set of unique aptamers for pool  $P$  be defined as  $S = \{s^j \in P \mid s^j \neq s^k \forall j, k \in [1, \dots, |S|] \wedge \sum_{j=1}^{|S|} m(s^j) = N\}$ , where  $m(s^j)$  corresponds to the frequency of  $s^i$ .

## Dimension reduction using Locality Sensitive Hashing

The principle of LSH relies on the fact that closely related, high-dimensional data points are likely to collapse to the same point after applying a probabilistic dimensionality reduction and will hence produce identical hash values [2].

AptaCluster capitalizes on this concept by representing each sequence  $s^j \in S$  as an  $n$ -dimensional vector and reducing this vector into  $d$  dimensions ( $d < n$ ). Our approach therefore produces a set  $I_d$  of  $d$  randomly sampled indices  $i \in [1, \dots, n]$  and restricts the number of nucleotides to be used for the hashing procedure to  $s_{i \in I_d}$  for each sequence  $s^j$ . This establishes a strong correlation between the sequence similarity of a set of aptamers and the likelihood of producing the same mapping, where the choice of  $d$  guarantees members of the same set to differ in at most  $n - d$  positions. In other words, our approach implicitly computes an upper bound to the edit distance.

AptaCluster then proceeds to iteratively refine this upper bound by applying a user defined number of distinct hash functions to the data set. Subsequently, two sequences are considered dissimilar with high probability if they are assigned to different sets in every iteration. The upper bound computation is modeled as  $d_{lsh}^k(s^1, s^2)$ , where  $k$  refers to the  $k^{th}$  iteration and  $L^k(s)$  stands for the value of the  $k^{th}$  hash function for sequence  $s$ . By setting  $d_{lsh}^0(s^1, s^2) = \infty$  for all pairs, the value of  $d_{lsh}$  is refined through the following recurrence.

$$d_{lsh}^k(s^1, s^2) = \begin{cases} n - d & L^k(s^1) = L^k(s^2) \\ d_{lsh}^{k-1}(s^1, s^2) & L^k(s^1) \neq L^k(s^2) \end{cases} \quad (1)$$

Here, only the assignment in the first line needs to be executed. Defining  $L^k(s)$  involves selecting a mapping  $h$  from a family of functions  $F$  at random

$$F = \{h : \mathbb{N}^l \rightarrow \mathbb{N}^d \parallel h(I) = I_d\} \quad (2)$$

where  $I = (1, \dots, n)$  represents the nucleotide positions of an aptamer of size  $n$ , followed by applying the function

$$L = \{\Omega^l \rightarrow \Omega^d \parallel L(s) = (s_i) \forall i \in I_d\} \quad (3)$$

to each aptamer  $s$ . This produces a sub-string  $\hat{s}$  constituting the concatenation of the nucleotides at the positions defined in  $I_d$ , which is subsequently used as input to the traditional hashing procedure.  $I_d = (i_0, \dots, i_d)$  can be efficiently computed as follows: Let  $i_0 \in [1, n]$  be a randomly selected index of  $I$  and define  $x \in [2, n-1]$  as a random number co-prime to  $n$ . Then, the remaining positions can be generated with

$$i_j = (i_{j-1} + x) \pmod n, \quad j = 1, \dots, d-1 \quad (4)$$

and

$$I_d = (i_j)_{j=0}^{d-1}, \quad i_j < i_{j+1} \forall j \quad (5)$$

corresponds to the sequence of indices after sorting these in ascending order. Designing  $I_d$  using the scheme described above assures each index in  $I$  to be selected exactly once and maximizes the probability that indices are chosen in a non-consecutive manner.

## Cluster Extraction

AptaCluster establishes aptamer families in order of the species' frequency-counts in the pool, drawing on the assumption that this measure is related to the selective advantage of an aptamer due to its binding affinity. Until no unassigned aptamers are left, the most frequent sequence  $s$  not belonging to any group is designated to be the seed of a new cluster, which is consequently expanded by computing a k-mer based distance between the seed and those sequences for which  $d_{lsh}$  was finite and for which  $d_{kmer}$  is smaller than a user defined cutoff. In particular,

$$d_{kmer}(s^x, s^y) = \sum_{i=1}^{4k} \left| \frac{X_i}{|s^x| - k + 1} - \frac{Y_i}{|s^y| - k + 1} \right|^2 \quad (6)$$

where  $X_i$  and  $Y_i$  denotes the number of times the  $i$ -th k-mer occurs in sequence  $s^x$  and  $s^y$  respectively and  $|s^i|$  corresponds to the length of the aptamer.

By circumventing the need to compute distances between species not related according to LSH, our method performs these steps in  $\mathcal{O}(N * m * k)$  time, where  $m$  denotes the maximum number of seed sequences in a hash bucket which is bounded by the size of the largest bucket generated during LSH.

### Parameters used in this study

For the experiments described in this paper, we performed a total of  $r = 15$  iterations of LSH while sampling 60% of the randomized region (i.e.  $n = 24$ ). The parameter  $d_{cutoff} = 5$  is set in terms of the maximal number of point mutations any pair of sequences should have and is converted into the k-mer distance  $d_{kmer}$  cutoff by sampling a user defined number of aptamers from the pool (10000 by default), artificially mutating that sequence up to  $d_{cutoff}$  times, and averaging over all  $d_{kmer}$  between these mutants and the wild-type. Using the estimator we derived in Supplementary Note 2, the value of  $d_{cutoff}$  corresponds to an initial sequence similarity of  $K = 87.5\%$ , and thus to a probability of encountering sequences with at least the specified similarity of  $1.3861 * 10^{-16}$  (see Supplementary Figure 2). Furthermore we set  $k = 3$  for the computation of  $d_{kmer}$  which has shown to give reasonable results for aptamer-sized sequences.

## Supplementary Note 2: Derivation and Convergence Analysis

The diversity of an initial pool in a SELEX experiment is a function of the sequence length. Here, we provide a mathematical estimation of the expected number of aptamers of size  $n$  with at least  $K$  % similarity.

### Problem Statement

Let  $\frac{1}{k}$ ,  $k \in \mathbb{N}$  be the threshold for the sequence dissimilarity according to the edit distance. Furthermore, we define  $n$  as the length of the aptamer and assume  $\frac{n}{k} \in \mathbb{N}$ . The expected fraction  $F(n, k)$  of aptamers with at most  $k\%$  dissimilarity can then be calculated the sum over all possible sequences with  $i$  variable nucleotides divided by the number of all permutations of sequences of size  $n$ :

$$F(n, k) = \sum_{i=1}^{\frac{n}{k}} f(i, n) \quad (7)$$

$$\text{where } f(i, n) = \frac{\binom{n}{i} 3^i}{4^n} \quad (8)$$

### Approximation

For  $i \leq \frac{n}{2}$  we have

$$f(i, n) > 3 * f(i - 1, n) \quad (9)$$

Proof:

$$f(i, n) = \frac{\binom{n}{i} 3^i}{4^n} = \frac{\binom{n}{i-1} 3^{i-1} * 3}{4^n} * \frac{n - i + 1}{i} \quad (10)$$

$$= f(i - 1, n) * \underbrace{\left( \frac{n + 1}{i} - 1 \right) * 3}_{\geq 1 \text{ for } i \leq \frac{1}{2}n} \geq 3 * f(i - 1, n) \quad (11)$$

Thus, we can approximate an upper bound to (7) using the last term of the expansion:

$$F(n, k) \approx f\left(i, \frac{n}{k}\right) = \frac{\binom{n}{\frac{n}{k}} 3^{\frac{n}{k}}}{4^n} = \left(\frac{3^{\frac{1}{k}}}{4}\right)^n * \frac{n!}{\frac{n}{k}!(n - \frac{n}{k})!} \quad (12)$$

Substituting  $x!$  with the Stirling approximation  $x! \approx \sqrt{2\pi x} * \frac{x^x}{e^x}$  we get

$$F(n, k) \approx \left(\frac{3^{\frac{1}{k}}}{4}\right)^n * \frac{\sqrt{2\pi n} * \left(\frac{n}{e}\right)^n}{\sqrt{2\pi \frac{n}{k}} * \left(\frac{n}{e}\right)^{\frac{n}{k}} * \sqrt{2\pi \left(n - \frac{n}{k}\right)} * \left(\frac{n - \frac{n}{k}}{e}\right)^{n - \frac{n}{k}}} \quad (13)$$

$$= \left(\frac{3^{\frac{1}{k}}}{4}\right)^n * \frac{\sqrt{2\pi n} * \left(\frac{n}{e}\right)^n}{\sqrt{2\pi \frac{n}{k}} * \left(\frac{n}{ke}\right)^{n\frac{1}{k}} * \sqrt{2\pi n \left(1 - \frac{1}{k}\right)} * \left(\frac{n * (1 - \frac{1}{k})}{e}\right)^{n * (1 - \frac{1}{k})}} \quad (14)$$

$$= \underbrace{\left(\frac{3^{\frac{1}{k}}}{4}\right)^n}_{(A)} * \underbrace{\frac{\sqrt{2\pi n}}{\sqrt{2\pi n \frac{1}{k}} * \sqrt{2\pi n \left(1 - \frac{1}{k}\right)}}}_{(B)} * \underbrace{\frac{\left(\frac{n}{e}\right)^n}{\left(\frac{n}{ke}\right)^{n\frac{1}{k}} * \left(\frac{n(1 - \frac{1}{k})}{e}\right)^{n(1 - \frac{1}{k})}}}_{(C)} \quad (15)$$

We can rewrite (C) as follows:

$$\frac{\left(\frac{n}{e}\right)^n}{\left(\frac{n}{ke}\right)^{n\frac{1}{k}} * \left(\frac{n(1 - \frac{1}{k})}{e}\right)^{n(1 - \frac{1}{k})}} = \frac{\left(\frac{n}{e}\right)^n}{\left(\frac{n}{e} * \frac{1}{k}\right)^{n\frac{1}{k}} * \left(\frac{n}{e} * \left(1 - \frac{1}{k}\right)\right)^{n(1 - \frac{1}{k})}} \quad (16)$$

$$= \frac{\left(\frac{n}{e}\right)^n}{\left(\frac{n}{e}\right)^{n\frac{1}{k}} * \left(\frac{1}{k}\right)^{n\frac{1}{k}} * \left(\frac{n}{e}\right)^{n(1 - \frac{1}{k})} * \left(1 - \frac{1}{k}\right)^{n(1 - \frac{1}{k})}} \quad (17)$$

$$= \frac{\left(\frac{n}{e}\right)^n}{\left(\frac{n}{e}\right)^{n\frac{1}{k} + n(1 - \frac{1}{k})} * \left(\frac{1}{k}\right)^{n\frac{1}{k}} * \left(1 - \frac{1}{k}\right)^{n(1 - \frac{1}{k})}} \quad (18)$$

$$= \frac{\left(\frac{n}{e}\right)^n}{\left(\frac{n}{e}\right)^{n\left(\frac{1}{k} + 1 - \frac{1}{k}\right)} * \left(\frac{1}{k}\right)^{n\frac{1}{k}} * \left(1 - \frac{1}{k}\right)^{n(1 - \frac{1}{k})}} \quad (19)$$

$$= \frac{1}{\left(\frac{1}{k}\right)^{n\frac{1}{k}} * \left(1 - \frac{1}{k}\right)^{n(1 - \frac{1}{k})}} \quad (20)$$

$$= \left(\frac{1}{\left(\frac{1}{k}\right)^{\frac{1}{k}} * \left(1 - \frac{1}{k}\right)^{\left(1 - \frac{1}{k}\right)}}\right)^n \quad (21)$$

$$= \left(\frac{1}{\left(\frac{1}{k}\right)^{\frac{1}{k}} * \left(\frac{k-1}{k}\right)^{\left(1 - \frac{1}{k}\right)}}\right)^n \quad (22)$$

$$= \left(\frac{1}{\frac{1^{\frac{1}{k}} * (k-1)^{1 - \frac{1}{k}}}{k^{\frac{1}{k}} * k^{1 - \frac{1}{k}}}}\right)^n \quad (23)$$

$$= \left(\frac{1}{\frac{1^{\frac{1}{k}} * (k-1)^{1 - \frac{1}{k}}}{k^{\frac{1}{k}} = 1 - \frac{1}{k}}}\right)^n \quad (24)$$

$$= \left(\frac{k}{(k-1)^{1 - \frac{1}{k}}}\right)^n \quad (25)$$

$$= \left( \frac{k(k-1)^{\frac{1}{k}}}{k-1} \right)^n := (D) \quad (26)$$

Combining (A) and (D) yields:

$$\left( \frac{3^{\frac{1}{k}}}{4} \right)^n * \left( \frac{k(k-1)^{\frac{1}{k}}}{k-1} \right)^n = \underbrace{\left( \frac{(3(k-1))^{\frac{1}{k}} * k}{4k-4} \right)^n}_{(E)} \quad (27)$$

Hence, an estimator for  $F(n, k)$  can be written in the form of (A) \* (E):

$$F(n, k) = \frac{\sqrt{2\pi n}}{\sqrt{2\pi n^{\frac{1}{k}} * \sqrt{2\pi n \left(1 - \frac{1}{k}\right)}}} * \left( \frac{(3(k-1))^{\frac{1}{k}} * k}{4(k-1)} \right)^n \quad (28)$$

Note, that for  $k \geq 2$  it follows that (E) decreases with  $k$  and  $(E) < 1$ . Hence  $F(n, k)$  decreases at least exponentially with  $n$  where the base of the exponent decreases with  $k$ .

## Supplementary Note 3: Aptasim Details

Aptasim is a program, aimed at realistically recreating the selection process during SELEX using error-prone PCR. For our simulation, we represent a pool as a set of sequences in which each sequence is attributed with a count, representing its frequency, and a value between 0 and 100 simulating the binding affinity to a putative target. Given an initial pool, we then perform a user-defined number of iterations comprising of target affine selection followed by error prone amplification. The remaining sequences after the selection stage represent the sequenced portion of HT-SELEX and are stored for further analysis.

### Initial Pool Generation

To allow for the inclusion of existing biases such as the base composition and nucleotide dependencies of a pool originating from an in-vitro SELEX experiment, the input set of sequences for the simulation is generated based on a first order Markov Chain that captures the conditional probabilities of randomly selecting one nucleotide given the choice of the previous. Each sequence is then assembled by randomly selecting the first nucleotide with respect to the base composition of the training data and iteratively sampling the remaining nucleotides according to the conditional distributions of the model. In addition, each sequence is assigned a random initial count ( $\leq 5$ ) as well as a binding affinity ( $\leq 25$ ). Finally, we simulate strong binders by choosing 100 arbitrary sequences for which the binding affinity is uniformly sampled between 80 and 100.

### Target Affine Sampling

The sampling step simulates incubation, binding, partitioning, and washing of a selection cycle during a SELEX experiment. Assuming enriched and target affine species to have a higher probability of selection, we sample, without replacement, 20% of the current pool according to the distribution of the sequence counts and accept a sequence with the probability corresponding to its binding affinity. Hence, the probability of selecting a sequence from the pool is proportional to its frequency and affinity.

### Amplification

In order to restore the pool to its original size, we simulate a number of PCR cycles in which the amplification efficiency  $e \in [0, 1]$  as well as the mutation probability  $p \in [0, 1]$  can be specified. The number of required PCR cycles  $c$  is computed as follows:

$$c = \left\lceil \frac{\log\left(\frac{i}{x}\right)}{\log(1+e)} \right\rceil$$

where  $i$  and  $x$  correspond to the sizes of the initial and current pool respectively. In each PCR cycle, every aptamer is then subject to amplification as many times as its current



count and in dependency of the specified probability of amplification  $e$ . If accepted, and based on the mutation probability  $p$ , the sequence is either duplicated or a mutant, differing by one base from the original at a random position, is introduced into the pool.

### **Default Parameters**

We trained our Markov Model with all sequences from selection round 2 of our IL10 experiment. An initial pool of 100 million unique sequences of size 40nt was then generated containing approximately 100 high affinity binders. We then performed a total of 10 cycles. During each sampling step, 20% of the pool was retained whereas for amplification, we found a mutation probability of  $p = 0.05$  and an amplification efficiency of  $e = 0.95$  as suitable parameters for realistically recreating the pool characteristics of our in-vitro experiment.

## Supplementary Note 4: AptaMut Details

AptaMut aims at extracting favorable mutants by recognizing that at each cycle, the sequenced aptamers represent a fraction of the true pool size (Figure 1b in paper). This is achieved by first identifying potentially favorable mutants in each cluster (sequence extraction) and consequently scoring each mutant, in which the likelihood of observing a divergent enrichment compared to the clusters’ seed sequence is computed. A log-score near zero indicates a neutral mutant while significantly positive (respectively negative) log scores indicate a possibility of beneficial (respectively detrimental) mutants. In the following, we describe the details of each of these steps.

### Sequence Extraction

We define a mutant as a sequence present in a particular cycle  $X$  and the next cycle  $X + 1$ , but that has never been encountered in the earliest sequenced pool. Consequently, a potentially favorable mutant is expected to have higher enrichment as compared to its parent sequence. Here, enrichment refers to the ratio between the mutant’s frequency in cycles  $X + 1$  and  $X$  normalized by their respective pool sizes. We used the clustering results of the four largest aptamer families of selection cycle 5 and extracted potential favorable mutants. These mutants are subsequently scores as described below.

### Scoring

In order to compute a score for each mutant reflecting the significance of the fold-change in enrichment between cycles  $X$  and  $X + 1$ , we developed a generative model mirroring the experimental design of the HT-SELEX protocol. The model is based on the notion that the sequenced aptamers at each cycle only represent a fraction of the true pool size and that the process of selecting these sequences from the pool can be described in terms of a Bernoulli experiment. In addition we assume that the enrichment and the amplification processes are subject to noise modeled by a normal distribution. The model is parametrized by the expected sequence enrichment so that different sequence enrichments correspond to different models. Given the model built using the enrichment equal to the enrichment of the seed, we compute the probability that the mutant’s counts in  $X$  and  $X + 1$  could have been generated by this model. This probability is then normalized by the probability of the optimal counts, as described below.

We divide each selection round into three distinct sets denoted as *pool*, representing the remaining sequences after selection and amplification, *sample*, describing the established, sequenced portion of this pool, and *experiment*, standing for the unknown species forming the input for the next cycle (see Fig. 1b in paper). Furthermore, let  $m_s^x$ ,  $m_e^x$ , and  $m_p^x = m_s^x + m_e^x$ , be the frequency of a sequence in the sets *sample*, *experiment*, and *pool* respectively. We define the enrichment of a sequence between selection cycles  $X$  and  $X + 1$

as  $f_s^{x \rightarrow x+1}$  for the sample sets, and as  $f_e^{x \rightarrow x+1}$  for the experiment sets. Similarly, we define the enrichment of the parent of the sequence between selection cycles as  $\hat{f}_s^{x \rightarrow x+1}$  for the sample sets and as  $\hat{f}_e^{x \rightarrow x+1}$  for the experiment sets. Finally, for a mutant that is neutral w.r.t. its parent sequence, its expected frequency in the pool  $X + 1$  can be described as

$$m_p^{x+1} \approx c * \hat{f}_s^{x \rightarrow x+1} * \underbrace{(m_p^x - m_s^x)}_{=m_e^x} \quad (29)$$

for any unknown count  $m_p^x$  in pool  $X$ . Here, we use the constant  $c$  to model both, the amplification stage (PCR) after each selection round and for normalization purposes.

Our model then aims at comparing the probability of observing frequencies  $m_s^x, m_s^{x+1}$  in sample sets  $X, X + 1$  of a mutant with the probability of observing the expected frequencies  $m_s^x, m_s^x * \hat{f}_s^{x \rightarrow x+1}$ . Let  $P(m_s^x, m_s^{x+1}, \hat{f}_s^{x \rightarrow x+1})$  refer to the probability of simultaneously observing  $m_s^x$  in sample set  $X$  and  $m_s^{x+1}$  in sample set  $X + 1$  by chance given the expected abundance of the mutant in the experiment sets can be described as a function of the enrichment of the parent sequence between the sample sets. Similarly,  $P(m_s^x, \hat{f}_s^{x \rightarrow x+1} * m_s^x, \hat{f}_s^{x \rightarrow x+1})$  refers to the probability of the mutant being neutral, i.e. observing  $m_s^x$  and  $\hat{f}_s^{x \rightarrow x+1} * m_s^x$  in the sample sets of  $X$  and  $X + 1$  respectively and under the assumption that their actual enrichment is identical to the seed's  $\hat{f}_s^{x \rightarrow x+1}$ . Then, we aim to compare  $P(m_s^x, m_s^{x+1}, \hat{f}_s^{x \rightarrow x+1})$  and  $P(m_s^x, \hat{f}_s^{x \rightarrow x+1} * m_s^x, \hat{f}_s^{x \rightarrow x+1})$ . We therefore define a significance score  $S(m_s^x, m_s^{x+1}, \hat{f}_s^{x \rightarrow x+1})$  for a mutant as the probability of the mutant's observed enrichment being higher than its parent, normalized by the probability of the mutant being neutral i.e. exhibiting an enrichment rate equal to its parent sequence:

$$S(m_s^x, m_s^{x+1}, \hat{f}_s^{x \rightarrow x+1}) = \frac{P(m_s^x, m_s^{x+1}, \hat{f}_s^{x \rightarrow x+1})}{P(m_s^x, \hat{f}_s^{x \rightarrow x+1} * m_s^x, \hat{f}_s^{x \rightarrow x+1})} \quad (30)$$

In what follows, we show how to compute  $P(m_s^x, m_s^{x+1}, \hat{f}_s^{x \rightarrow x+1})$  and  $P(m_s^x, \hat{f}_s^{x \rightarrow x+1} * m_s^x, \hat{f}_s^{x \rightarrow x+1})$ . The observations  $m_s^x$  and  $m_s^{x+1}$  in the sample sets can be interpreted as the result of partitioning pools  $X$  and  $X + 1$  into *sample* and *experiment* sets and hence as random variables following binomial distributions, in which  $m_s^x$  and  $m_s^{x+1}$  correspond to a known number of successes out of  $m_p^x$  and  $m_p^{x+1}$  unknown trials respectively. For any frequency of a mutant  $m_p$  in each pool, the probability of observing exactly  $m_s$  mutants in the sample set is then given by the probability mass function (*pmf*)

$$f_B(m_s, m_p, p) = Pr(X = m_s) = \binom{m_p}{m_s} p^{m_s} (1-p)^{m_p - m_s} \quad (31)$$

of the Binomial distribution  $B(m_p, p)$  and the probability of simultaneously observing both frequencies in the sampled pools corresponds to the product of their respective *pmfs*. Since

the original number of mutants in pool  $X$  is an unknown quantity, we have to consider all possible pool sizes in order to estimate  $P(m_s^x, m_s^{x+1}, \hat{f}_s^{x \rightarrow x+1})$ :

$$P\left(m_s^x, m_s^{x+1}, \hat{f}_s^{x \rightarrow x+1}\right) = \sum_{m_p^x=m_s^x}^{\infty} f_B\left(m_p^x, m_s^x, p\right) * f_B\left(m_p^{x+1}, m_s^{x+1}, p\right) \quad (32)$$

So far, our model is only concerned with possible variations in the number of mutant sequences in the pool and does not take into account any biases that might affect the enrichment value of the seed sequence. These noises, such as artifacts during PCR and sequencing errors, might lead to an overestimation or underestimation of the true enrichment value. We therefore extend our approach with a continuous random variable  $f$  to model the observed seed enrichment  $\hat{f}_s^{x \rightarrow x+1}$  in the sequenced portion of the pool. More specifically, we assume that  $f$  follows a normal distribution  $\mathcal{N}(\hat{f}_s^{x \rightarrow x+1}, \hat{f}_s^{x \rightarrow x+1}/3)$  with mean  $\hat{f}_s^{x \rightarrow x+1}$  and standard deviation  $\hat{f}_s^{x \rightarrow x+1}/3$ . We then express the probability of observing frequencies of a mutant in sample sets  $X$ ,  $X + 1$  and the probability of observing its expected frequencies as functions of  $f$ . It follows that the new significance score of a mutant, denoted as  $\hat{S}$ , corresponds to ratio of the expected values of these functions:

$$\hat{S}\left(m_s^x, m_s^{x+1}, \hat{f}_s^{x \rightarrow x+1}\right) = \frac{\int_0^{\infty} P\left(m_s^x, m_s^{x+1}, f\right) p(f) df}{\int_0^{\infty} P\left(m_s^x, \hat{f}_s^{x \rightarrow x+1} * m_s^x, f\right) p(f) df} \quad (33)$$

Here,  $p(f)$  is the probability density function of the normal distribution  $\mathcal{N}(\hat{f}_s^{x \rightarrow x+1}, \hat{f}_s^{x \rightarrow x+1}/3)$ . Finally, we approximate each integral within three standard deviations from the mean by discretizing  $p(f)$  into equidistant intervals of length  $d$  denoted as  $k = \lfloor 2\hat{f}_s^{x \rightarrow x+1}/d \rfloor - 1$ . Below, we show how to approximate the integral on the example of the numerator and note that the denominator is approximated in a similar manner.

$$\begin{aligned} \int_0^{\infty} P\left(m_s^x, m_s^{x+1}, f\right) p(f) df &\approx \int_0^{2\hat{f}_s^{x \rightarrow x+1}} P\left(m_s^x, m_s^{x+1}, f\right) p(f) df \\ &\approx \sum_{i=1}^k P\left(m_s^x, m_s^{x+1}, f\right) * P\left(i * d \leq f < (i + 1) * d\right) \end{aligned} \quad (34)$$

Setting  $p = 0.5$ , therefore assuming that each mutant has equal chance of being selected for sequencing, allows for the computation of the significance score  $\hat{S}$  for all favorable mutants identified during the sequence extraction step. Analogous to  $p$ , we set  $c = 2$ , hence assuming that after selection, each pool is amplified back to its original size. For the discretization step, we found that a value of  $d = 0.5$  as the width of intervals yielded the desired accuracy for our purposes. The main text we show  $\log(\hat{S})$  values of the so computed scores.

## Supplementary Figure 1: False Negative Rates

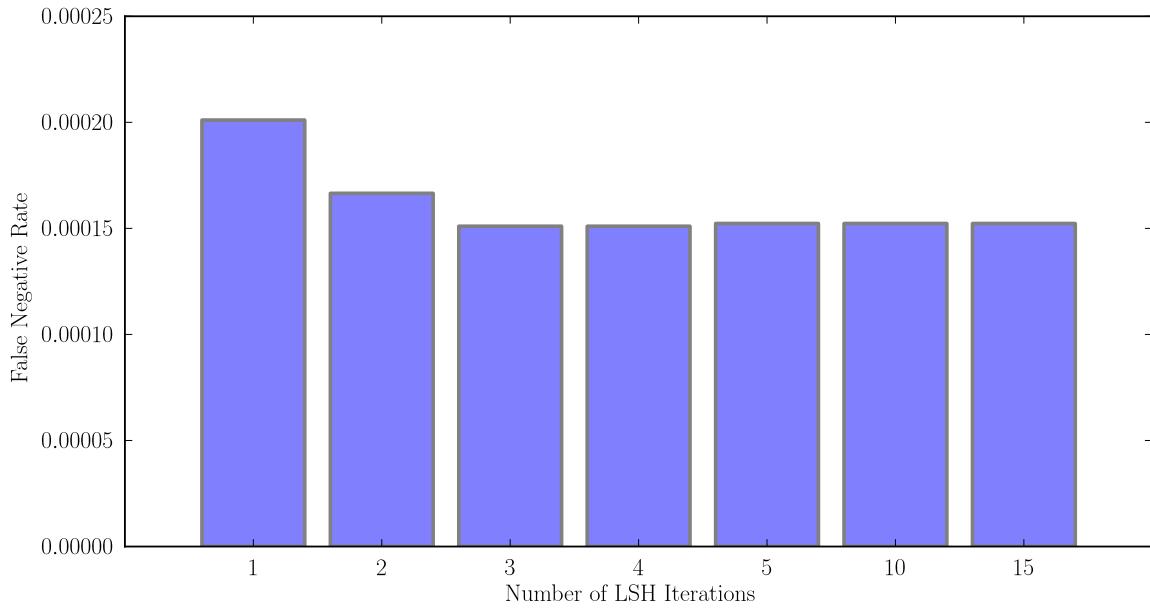

The false negative rates for the 20 largest clusters for different numbers of locality sensitive hashing iterations in selection cycle 5. The graph shows that LSH is stable for even a small number of iterations.

## Supplementary Figure 2: Initial Pool Composition

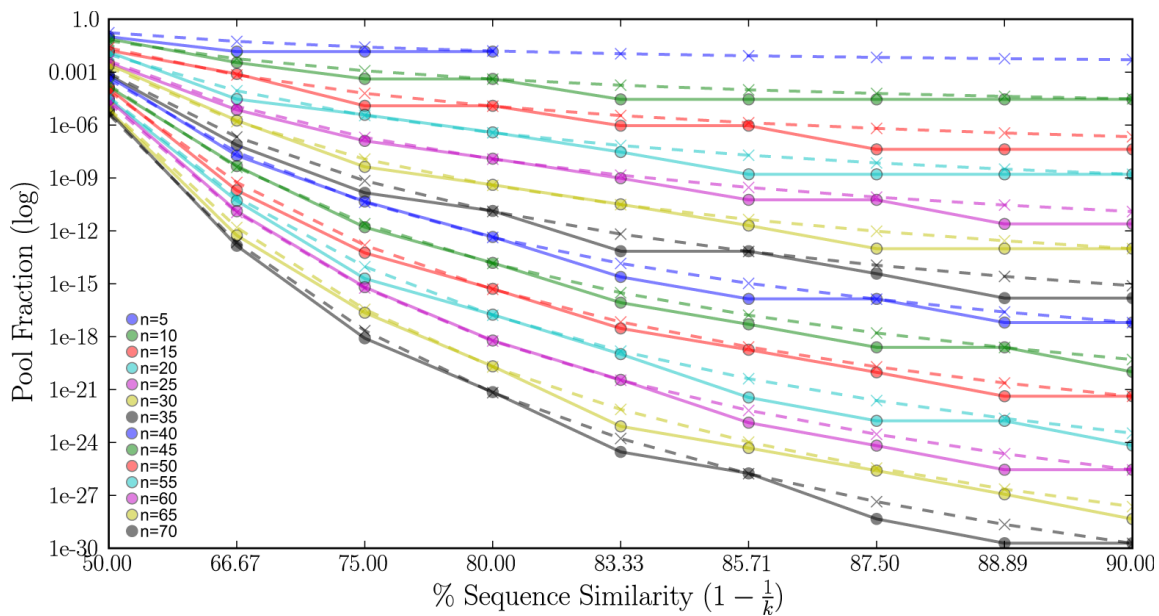

Comparison of the predicted pool fraction of sequences with an expected sequence similarity  $K$  between our estimator (dashed lines) and the exact formula (continuous lines). Our estimator provides a reasonable upper bound for the expected fraction of sequences in an initial pool with at most  $K\%$  sequence similarity.

### Supplementary Figure 3: Phylogenetic Tree of Cluster ID 2

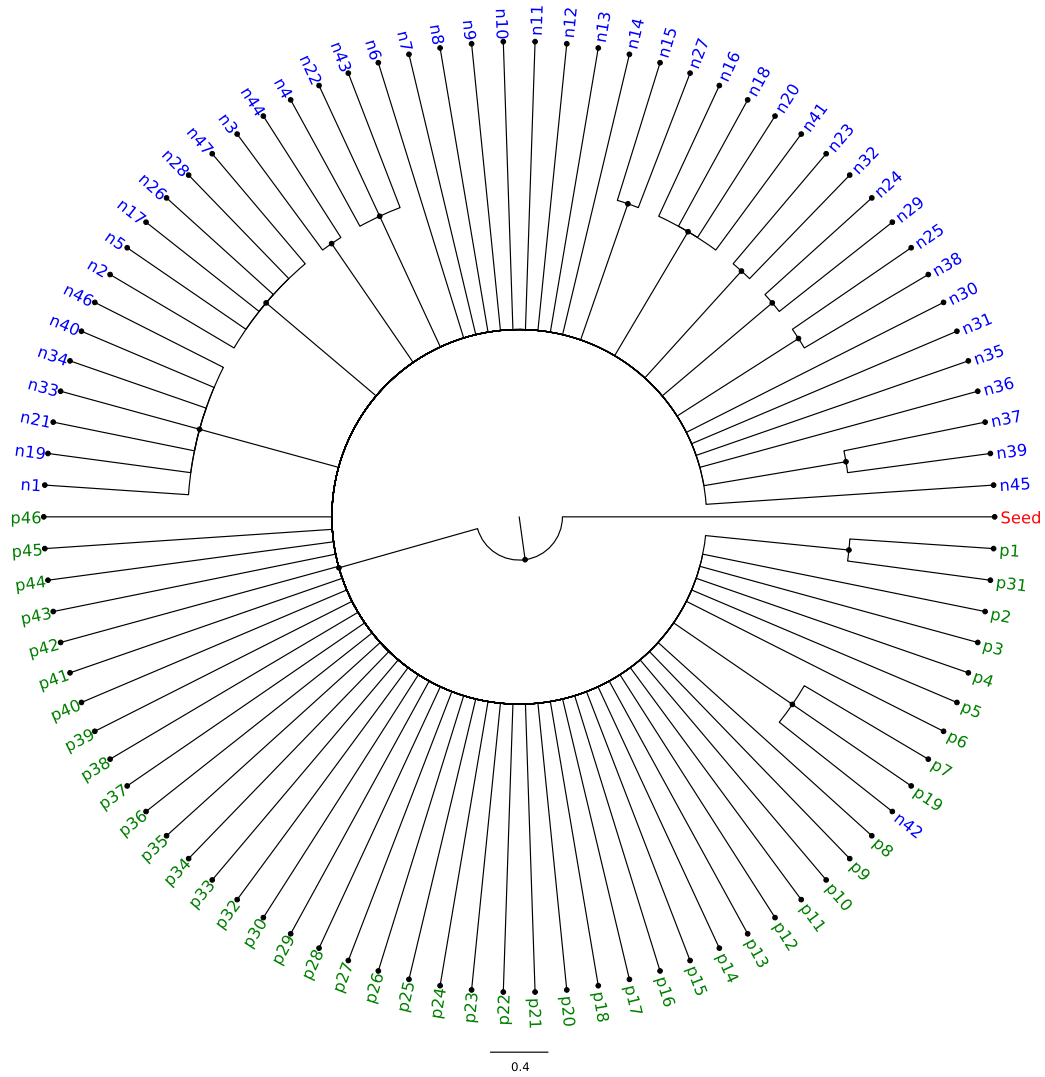

Phylogenetic tree of the mutants from cluster ID 2. Leaves labeled with **p** (green) correspond to the set of beneficial mutants in the order as depicted in Supplementary Table 3, where leaves starting with **n** (blue) stand for the degenerative species. The tree was constructed with PAUP\* version 4.0 beta using the heuristic search option (1 Mio iterations) and an initial tree construction by adding species in the order of increasing log-score.

## Supplementary Table 1: Sequences Introduced due to Mutagenesis

Number of species with counts 1 to 5 present in the top 20 clusters of selection round 5 compared to the frequency of their occurrence in selection round 2. The overwhelming majority of the sequences are not present in the latter.

|                         | <b>Nr. of aptamers with frequency</b> |      |      |     |     |
|-------------------------|---------------------------------------|------|------|-----|-----|
|                         | 1                                     | 2    | 3    | 4   | 5   |
| <b>Top 20, cycle 5</b>  | 8529                                  | 2202 | 1074 | 614 | 465 |
| <b>Found in cycle 2</b> | 61                                    | 36   | 27   | 18  | 16  |



## Supplementary Table 2: Cluster ID 1 - Selected Aptamers for Structural Analysis

Legend: Seed Sequence Enriched Mutants Depleted Mutants Pool Size 4: 1923823  
Pool Size 5: 4621438

| Cluster ID    | Aptamer                                       | Count Round 5 | Fraction R5     | Enrichment         | Count Round 4 | Fraction R4     | Log Score    |
|---------------|-----------------------------------------------|---------------|-----------------|--------------------|---------------|-----------------|--------------|
| <b>SEED 1</b> | <b>TAACACTCGATTTCCTAGCCCGCTAGAAATCCCCTCCC</b> | <b>351921</b> | <b>7.61E-02</b> | <b>30.31212404</b> | <b>4833</b>   | <b>2.51E-03</b> |              |
| p1            | TAACACTCGATTTCCTAGCCCGCTAGAAATCCCCTCCC        | 3097          | 0.000670138     | 429.7421301        | 3             | 1.56E-06        | -19.16434217 |
| p2            | TAACACTCGATTTCCTAGCCCGCTAGAAATCCCCTCCC        | 1093          | 0.000236506     | 227.4982959        | 2             | 1.04E-06        | -6.862747998 |
| p3            | TAACACTCGATTTCCTAGCCCGCTAGAAATCCCCTCCC        | 336           | 7.27E-05        | 139.8708644        | 1             | 5.20E-07        | -2.642604337 |
| p4            | TAACACTCGATTTCCTAGCCCGCTAGAAATCCCCTCCC        | 1131          | 0.000244729     | 117.7038301        | 4             | 2.08E-06        | -4.484570278 |
| p5            | TAACACTCGATTTCCTAGCCCGCTAGAAATCCCCTCCC        | 472           | 0.000102133     | 98.24263097        | 2             | 1.04E-06        | -2.042432047 |
| p6            | TAACACTCGATTTCCTAGCCCGCTAGAAATCCCCTCCC        | 432           | 9.35E-05        | 89.91698428        | 3             | 1.04E-06        | -1.754571899 |
| p7            | TAACACTCGATTTCCTAGCCCGCTAGAAATCCCCTCCC        | 622           | 0.00013459      | 86.30920405        | 2             | 1.56E-06        | -2.21397266  |
| p8            | TAACACTCGATTTCCTAGCCCGCTAGAAATCCCCTCCC        | 204           | 4.41E-05        | 84.92159627        | 1             | 5.20E-07        | -1.387821997 |
| p9            | TAACACTCGATTTCCTAGCCCGCTAGAAATCCCCTCCC        | 404           | 8.74E-05        | 84.0890316         | 2             | 1.04E-06        | -1.53965282  |
| p10           | TAACACTCGATTTCCTAGCCCGCTAGAAATCCCCTCCC        | 388           | 8.40E-05        | 80.75877292        | 2             | 1.04E-06        | -1.433547752 |
| p11           | TAACACTCGATTTCCTAGCCCGCTAGAAATCCCCTACC        | 188           | 4.07E-05        | 78.26107891        | 1             | 5.20E-07        | -1.228048933 |
| p12           | TAACACTCGATTTCCTAGCCCGCTAGAAATCCCCTCCC        | 1445          | 0.000312673     | 75.19099669        | 8             | 4.16E-06        | -2.98686202  |
| p13           | TAACACTCGATTTCCTAGCCCGCTAGAAATCCCCTCCC        | 174           | 3.77E-05        | 72.43312623        | 1             | 5.20E-07        | -1.130789174 |
| p14           | TAACACTCGATTTCCTAGCCCGCTAGAAATCCCCTCCC        | 167           | 3.61E-05        | 69.51914988        | 1             | 5.20E-07        | -1.108986469 |
| p15           | TAACACTCGATTTCCTAGCCCGCTAGAAATCCCCTCCC        | 645           | 0.000139567     | 67.12552646        | 4             | 2.08E-06        | -1.582980065 |
| p16           | TAACACTCGATTTCCTAGCCCGCTAGAAATCCCCTCCC        | 315           | 6.82E-05        | 65.5644677         | 2             | 1.04E-06        | -0.901286456 |
| p17           | TAACACTCGATTTCCTAGCCCGCTAGAAATCCCCTCCC        | 305           | 6.60E-05        | 63.48305603        | 2             | 1.04E-06        | -0.837647438 |
| p18           | TAACACTCGATTTCCTAGCCCGCTAGAAATCCCCTCCC        | 152           | 3.29E-05        | 63.27491486        | 1             | 5.20E-07        | -1.067580847 |
| p19           | TAACACTCGATTTCCTAGCCCGCTAGAAATCCCCTCCC        | 443           | 9.59E-05        | 61.47102475        | 3             | 1.56E-06        | -1.091191611 |
| p20           | TAACACTCGATTTCCTAGCCCGCTAGAAATCCCCTCCC        | 424           | 9.17E-05        | 58.83456996        | 3             | 1.56E-06        | -0.99261414  |
| p21           | TAACACTCGATTTCCTAGCCCGCTAGAAATCCCCTCCC        | 540           | 0.000116847     | 56.19811518        | 4             | 2.08E-06        | -1.022545259 |
| p22           | TAACACTCGATTTCCTAGCCCGCTAGAAATCCCCTCCC        | 266           | 5.76E-05        | 55.36555051        | 2             | 1.04E-06        | -0.595583672 |
| p23           | TAACACTCGATTTCCTAGCCCGCTAGAAATCCCCTCCT        | 660           | 0.000142813     | 54.94926817        | 5             | 2.60E-06        | -1.07750217  |
| p24           | TAACACTCGATTTCCTAGCCCGCTAGAAATCCACTCCC        | 372           | 8.05E-05        | 51.61900949        | 3             | 1.56E-06        | -0.69557297  |
| p25           | TAACACTCGATTTCCTAGCCCGCTAGAAATACCCTCCC        | 123           | 2.66E-05        | 51.20272716        | 1             | 5.20E-07        | -0.891868083 |
| p26           | TAACACTCGATTTCCTATCCCGCTAGAAATCCCCTCCC        | 1428          | 0.000308995     | 45.72701337        | 13            | 6.76E-06        | -0.898079417 |
| p27           | TAACACTCGATTTCCTAGCCCGCTAGAAATCCCCTCCC        | 867           | 0.000187604     | 45.11459802        | 8             | 4.16E-06        | -0.705078901 |
| p28           | TAACACTCGATTTCCTAGCCCGCTAGAAATCCCCTCCC        | 431           | 9.33E-05        | 44.85442156        | 4             | 2.08E-06        | -0.502529456 |
| p29           | TAACACTCGATTTCCTAGCCCGCTAGAAATCCCCTCCC        | 106           | 2.29E-05        | 44.12592747        | 1             | 5.20E-07        | -0.524085542 |
| p30           | TAACACTCGATTTCCTAGCCCGCTAGAAATCCCCTCCC        | 105           | 2.27E-05        | 43.70964514        | 1             | 5.20E-07        | -0.524085542 |
| n1            | TAACCTCGATTTCCTAGCCCGCTAGAAATCCCCTCCC         | 30            | 6.49E-06        | 12.48847004        | 1             | 5.20E-07        | -2.136210865 |
| n2            | TAACACTCGATTTCCTAGCCCGCTAGAAATCCCCTCCC        | 24            | 5.19E-06        | 9.990776031        | 1             | 5.20E-07        | -2.628904498 |
| n3            | TAACACTCGATTTCCTAGCCCGCTAGAAATCCCCTCCG        | 125           | 2.70E-05        | 8.672548638        | 6             | 3.12E-06        | -0.545491351 |
| n4            | TAACACTCGATTTCCTAGCCCGCTAGAAATCCCCTCCC        | 40            | 8.66E-06        | 8.325646693        | 2             | 1.04E-06        | -0.535680901 |
| n5            | TAACACTCGATTTCCTAGCCCGCTAGAAATCCCCTCCC        | 36            | 7.79E-06        | 7.493082023        | 2             | 1.04E-06        | -0.891422702 |
| n6            | TAACACTCGATTTCCTAGCCCGCTAGAAATCCCCTCCC        | 36            | 7.79E-06        | 7.493082023        | 2             | 1.04E-06        | -0.891422702 |
| n7            | TAACCTCGATTTCCTAGCCCGCTAGAAATCCCCTCCC         | 330           | 7.14E-05        | 6.868658521        | 20            | 1.04E-05        | -2.56278133  |
| n8            | TAACCTCGATTTCCTAGCCCGCTAGAAATCCCCTCCC         | 10            | 2.16E-06        | 4.162823346        | 1             | 5.20E-07        | -4.397795847 |
| n9            | TAACGCGGATTTCCTAGCCCGCTAGAAATCCCCTCCC         | 30            | 6.49E-06        | 3.12211751         | 4             | 2.08E-06        | -2.075661839 |
| n10           | TAACGCGGATTTCCTAGCCCGCTAGAAATCCCCTCCC         | 5             | 1.08E-06        | 2.081411673        | 1             | 5.20E-07        | -5.049623067 |

# Supplementary Table 3: Cluster ID 2 - Selected Aptamers for Structural Analysis

Legend: Seed Sequence Enriched Mutants Depleted Mutants Pool Size 4: 192323  
Pool Size 5: 4621438

| Cluster ID | Aptamer                                | Count Round 5 | Fraction R5 | Enrichment   | Count Round 4 | Fraction R4 | Log Score    |
|------------|----------------------------------------|---------------|-------------|--------------|---------------|-------------|--------------|
| Seed 2     | TCACAGTCCCGGTCCCGCCTAAAACCCATTGTGTGGCA | 636712        | 0.152938639 | 3.971389919  | 56879         | 0.038510104 |              |
| p1         | TCACAGTCCCGGTCCCGCCTAAAACCCATTGTGTGGCA | 12284         | 0.002950625 | 26.4123662   | 165           | 0.000111714 | -117.057533  |
| p2         | TCACATTCOCGGTCCCGCCTAAAACCCATTGTGTGGCA | 2312          | 0.000507304 | 28.81854249  | 26            | 1.76034E-05 | -27.25102639 |
| p3         | TCACAGTCCCGGTCCCGCCTAAAACCCATTGTGTGGCA | 3390          | 0.00086232  | 16.79339037  | 76            | 5.1456E-05  | -21.38465366 |
| p4         | TCACAGTCCCGGTCCCGCCTAAAACCCATTGTGTGGCA | 690           | 0.00165738  | 18.83029765  | 13            | 8.80169E-06 | -8.671586115 |
| p5         | TCACAGTCCCGGTCCCGCCTAAAACCCATTGTGTGGCA | 749           | 0.00017991  | 13.98555364  | 19            | 1.2864E-05  | -6.523900233 |
| p6         | TCACAGTCCCGGTCCCGCCTAAAACCCATTGTGTGGCA | 855           | 0.000205372 | 13.18832756  | 23            | 1.55722E-05 | -6.443160461 |
| p7         | TCACAGTCCCGGTCCCGCCTAAAACCCATTGTGTGGCA | 640           | 0.000153728 | 14.19094895  | 16            | 1.08328E-05 | -6.064025487 |
| p8         | TCACAGTCCCGGTCCCGCCTAAAACCCATTGTGTGGCA | 578           | 0.000138936 | 13.67061416  | 15            | 1.01558E-05 | -5.460460433 |
| p9         | TCACAGTCCCGGTCCCGCCTAAAACCCATTGTGTGGCA | 277           | 6.65356E-05 | 19.6546463   | 5             | 3.98527E-06 | -3.023949665 |
| p10        | TCACAGTCCCGGTCCCGCCTAAAACCCATTGTGTGGCA | 176           | 4.22753E-05 | 31.22008769  | 2             | 1.35411E-06 | -4.91133152  |
| p11        | TCACAGTCCCGGTCCCGCCTAAAACCCATTGTGTGGCA | 262           | 6.29326E-05 | 18.59014313  | 5             | 3.38527E-06 | -4.65225577  |
| p12        | TCACAGTCCCGGTCCCGCCTAAAACCCATTGTGTGGCA | 581           | 0.000139557 | 12.12491374  | 17            | 1.15009E-05 | -4.643814886 |
| p13        | TCACAGTCCCGGTCCCGCCTAAAACCCATTGTGTGGCA | 905           | 0.00017392  | 9.729400607  | 33            | 2.23428E-05 | -3.93995426  |
| p14        | TCACAGTCCCGGTCCCGCCTAAAACCCATTGTGTGGCA | 1283          | 0.000308197 | 8.753359377  | 52            | 3.82068E-05 | -3.85252129  |
| p15        | TCACAGTCCCGGTCCCGCCTAAAACCCATTGTGTGGCA | 542           | 0.000130189 | 10.12038728  | 19            | 1.2864E-05  | -3.348674248 |
| p16        | TCACAGTCCCGGTCCCGCCTAAAACCCATTGTGTGGCA | 183           | 4.39567E-05 | 16.23089786  | 4             | 2.70821E-06 | -3.281538437 |
| p17        | TCACAGTCCCGGTCCCGCCTAAAACCCATTGTGTGGCA | 455           | 0.000109291 | 10.08887777  | 16            | 1.08328E-05 | -3.037677076 |
| p18        | TCACAGTCCCGGTCCCGCCTAAAACCCATTGTGTGGCA | 401           | 9.63205E-05 | 10.16173309  | 14            | 9.47874E-06 | -2.88871647  |
| p19        | TCACAGTCCCGGTCCCGCCTAAAACCCATTGTGTGGCA | 115           | 2.76231E-05 | 20.39948912  | 2             | 1.35411E-06 | -2.882937703 |
| p20        | TCACAGTCCCGGTCCCGCCTAAAACCCATTGTGTGGCA | 969           | 0.000232754 | 7.994784613  | 43            | 2.01133E-05 | -2.553277719 |
| p21        | TCACAGTCCCGGTCCCGCCTAAAACCCATTGTGTGGCA | 101           | 2.42603E-05 | 17.91607305  | 2             | 1.35411E-06 | -2.400091518 |
| p22        | TCACATTCOCGGTCCCGCCTAAAACCCATTGTGTGGCA | 196           | 4.70739E-05 | 11.58927498  | 6             | 4.06232E-06 | -2.39723436  |
| p23        | TCACAGTCCCGGTCCCGCCTAAAACCCATTGTGTGGCA | 911           | 0.000218823 | 7.695211009  | 42            | 2.84362E-05 | -2.240324041 |
| p24        | TCACAGTCCCGGTCCCGCCTAAAACCCATTGTGTGGCA | 458           | 0.000119281 | 10.11105113  | 19            | 1.2864E-05  | -2.213139922 |
| p25        | TCACAGTCCCGGTCCCGCCTAAAACCCATTGTGTGGCA | 118           | 2.83437E-05 | 13.95443314  | 3             | 2.03116E-06 | -2.146358736 |
| p26        | TCACAGTCCCGGTCCCGCCTAAAACCCATTGTGTGGCA | 561           | 0.000134753 | 7.961123262  | 25            | 1.69263E-05 | -2.057182526 |
| p27        | TCACATTCOCGGTCCCGCCTAAAACCCATTGTGTGGCA | 432           | 0.000103767 | 7.298202318  | 21            | 1.42181E-05 | -1.470565613 |
| p28        | TCACAGTCCCGGTCCCGCCTAAAACCCATTGTGTGGCA | 430           | 0.000103286 | 7.264414344  | 21            | 1.42181E-05 | -1.470565613 |
| p29        | TCACAGTCCCGGTCCCGCCTAAAACCCATTGTGTGGCA | 114           | 7.18216E-05 | 10.11105113  | 2             | 1.35411E-06 | -1.393545601 |
| p30        | TCACAGTCCCGGTCCCGCCTAAAACCCATTGTGTGGCA | 621           | 0.000149165 | 6.676196438  | 33            | 2.23428E-05 | -1.270741846 |
| p31        | TCACAGTCCCGGTCCCGCCTAAAACCCATTGTGTGGCA | 67            | 1.60934E-05 | 11.88491975  | 2             | 1.35411E-06 | -1.265229786 |
| p32        | TCACAGTCCCGGTCCCGCCTAAAACCCATTGTGTGGCA | 164           | 3.93929E-05 | 8.311841529  | 7             | 4.73937E-06 | -1.250908609 |
| p33        | TCACAGTCCCGGTCCCGCCTAAAACCCATTGTGTGGCA | 233           | 5.59668E-05 | 7.514752513  | 11            | 7.44758E-06 | -1.224306127 |
| p34        | TCACAGTCCCGGTCCCGCCTAAAACCCATTGTGTGGCA | 116           | 7.7831E-05  | 8.230750392  | 5             | 3.38527E-06 | -1.071681384 |
| p35        | TCACAGTCCCGGTCCCGCCTAAAACCCATTGTGTGGCA | 501           | 0.000120341 | 6.347915558  | 28            | 1.89575E-05 | -1.007569904 |
| p36        | TCACAGTCCCGGTCCCGCCTAAAACCCATTGTGTGGCA | 347           | 8.33496E-05 | 6.479288534  | 19            | 1.2864E-05  | -0.949563116 |
| p37        | TCACAGTCCCGGTCCCGCCTAAAACCCATTGTGTGGCA | 2226          | 0.000534687 | 5.806811097  | 136           | 9.20792E-05 | -0.883078415 |
| p38        | TCACAGTCCCGGTCCCGCCTAAAACCCATTGTGTGGCA | 191           | 4.58783E-05 | 6.776178124  | 10            | 6.77053E-06 | -0.854657601 |
| p39        | TCACAGTCCCGGTCCCGCCTAAAACCCATTGTGTGGCA | 803           | 0.000192881 | 5.813944902  | 49            | 3.81759E-05 | -0.78047461  |
| p40        | TCACAGTCCCGGTCCCGCCTAAAACCCATTGTGTGGCA | 405           | 9.72813E-05 | 5.948686589  | 24            | 1.62439E-05 | -0.759175506 |
| p41        | TCACAGTCCCGGTCCCGCCTAAAACCCATTGTGTGGCA | 675           | 0.000162135 | 5.701720561  | 42            | 2.84362E-05 | -0.792846661 |
| p42        | TCACAGTCCCGGTCCCGCCTAAAACCCATTGTGTGGCA | 130           | 3.12261E-05 | 6.58865487   | 7             | 4.73937E-06 | -0.648015293 |
| p43        | TCACAGTCCCGGTCCCGCCTAAAACCCATTGTGTGGCA | 47            | 1.12894E-05 | 8.337182509  | 2             | 1.35411E-06 | -0.640776194 |
| p44        | TCACAGTCCCGGTCCCGCCTAAAACCCATTGTGTGGCA | 173           | 4.15947E-05 | 6.137589421  | 10            | 6.77053E-06 | -0.584369492 |
| p45        | TCACAGTCCCGGTCCCGCCTAAAACCCATTGTGTGGCA | 63            | 1.51316E-05 | 7.450248139  | 3             | 2.03116E-06 | -0.575824787 |
| p46        | TCACAGTCCCGGTCCCGCCTAAAACCCATTGTGTGGCA | 641           | 0.000153969 | 5.414522784  | 42            | 2.84362E-05 | -0.513959741 |
| n1         | GCACAGTCCCGGTCCCGCCTAAAACCCATTGTGTGGCA | 610           | 0.000146522 | 0.535673197  | 404           | 0.000273529 | -8.878266926 |
| n2         | TCAAAGTCCCGGTCCCGCCTAAAACCCATTGTGTGGCA | 414           | 9.94431E-05 | 0.597058218  | 246           | 0.000166555 | -4.00194793  |
| n3         | TCACAGTCCCGGTCCCGCCTAAAACCCATTGTGTGGCA | 593           | 0.000142439 | 0.947661343  | 222           | 0.000150306 | -3.932926632 |
| n4         | TCACAGTCCCGGTCCCGCCTAAAACCCATTGTGTGGCA | 4             | 6.60803E-07 | 0.129008627  | 11            | 7.44758E-06 | -3.267168663 |
| n5         | TCAAAGTCCCGGTCCCGCCTAAAACCCATTGTGTGGCA | 4             | 6.60803E-07 | 0.129008627  | 11            | 7.44758E-06 | -3.267168663 |
| n6         | TCACAGTCCCGGTCCCGCCTAAAACCCATTGTGTGGCA | 102           | 2.45005E-05 | 0.314668868  | 115           | 7.78611E-05 | -3.252188056 |
| n7         | TCACAGTCCCGGTCCCGCCTAAAACCCATTGTGTGGCA | 66            | 1.58532E-05 | 0.650418494  | 36            | 2.43739E-05 | -2.645311843 |
| n8         | TCACAGTCCCGGTCCCGCCTAAAACCCATTGTGTGGCA | 69            | 1.65738E-05 | 0.281372264  | 87            | 5.89036E-05 | -2.62296625  |
| n9         | TCACAGTCCCGGTCCCGCCTAAAACCCATTGTGTGGCA | 164           | 3.93929E-05 | 0.684504596  | 85            | 5.75495E-05 | -2.511193192 |
| n10        | TCACAGTCCCGGTCCCGCCTAAAACCCATTGTGTGGCA | 75            | 1.8015E-05  | 0.239711976  | 111           | 7.51529E-05 | -2.398060114 |
| n11        | TCACAGTCCCGGTCCCGCCTAAAACCCATTGTGTGGCA | 37            | 8.88742E-06 | 0.620577513  | 21            | 1.42181E-05 | -2.38028024  |
| n12        | TCACAGTCCCGGTCCCGCCTAAAACCCATTGTGTGGCA | 91            | 2.18583E-05 | 0.768676402  | 42            | 2.84362E-05 | -2.365210473 |
| n13        | TCACAGTCCCGGTCCCGCCTAAAACCCATTGTGTGGCA | 106           | 2.54613E-05 | 0.854682153  | 44            | 2.97903E-05 | -2.258368502 |
| n14        | TCACAGTCCCGGTCCCGCCTAAAACCCATTGTGTGGCA | 72            | 1.72946E-05 | 0.774053763  | 33            | 2.23428E-05 | -2.238622405 |
| n15        | TCACAGTCCCGGTCCCGCCTAAAACCCATTGTGTGGCA | 158           | 3.79517E-05 | 0.1019168152 | 55            | 3.72379E-05 | -2.181143995 |
| n16        | TCACAGTCCCGGTCCCGCCTAAAACCCATTGTGTGGCA | 4             | 6.60803E-07 | 0.236515816  | 6             | 4.06232E-06 | -1.96587893  |
| n17        | TAAAGTCCCGGTCCCGCCTAAAACCCATTGTGTGGCA  | 4             | 6.60803E-07 | 0.236515816  | 6             | 4.06232E-06 | -1.96587893  |
| n18        | TCACAGTCCCGGTCCCGCCTAAAACCCATTGTGTGGCA | 2             | 4.80401E-07 | 0.118257908  | 6             | 4.06232E-06 | -1.96587893  |
| n19        | GCACAGTCCCGGTCCCGCCTAAAACCCATTGTGTGGCA | 2             | 4.80401E-07 | 0.118257908  | 6             | 4.06232E-06 | -1.96587893  |
| n20        | TCACAGTCCCGGTCCCGCCTAAAACCCATTGTGTGGCA | 743           | 0.000178469 | 1.432591722  | 184           | 0.000124578 | -1.912815245 |
| n21        | GCACAGTCCCGGTCCCGCCTAAAACCCATTGTGTGGCA | 4             | 6.60803E-07 | 0.283818979  | 5             | 3.38527E-06 | -1.693529234 |
| n22        | TCACAGTCCCGGTCCCGCCTAAAACCCATTGTGTGGCA | 867           | 0.000208254 | 1.297843116  | 237           | 0.000160462 | -1.645064777 |
| n23        | TCACAGTCCCGGTCCCGCCTAAAACCCATTGTGTGGCA | 7             | 1.6814E-06  | 0.354773724  | 7             | 4.73937E-06 | -1.578331946 |
| n24        | TCACAGTCCCGGTCCCGCCTAAAACCCATTGTGTGGCA | 762           | 0.000183033 | 1.590221044  | 170           | 0.000115099 | -1.542056568 |
| n25        | TCACAGTCCCGGTCCCGCCTAAAACCCATTGTGTGGCA | 882           | 0.000211857 | 1.594841757  | 196           | 0.000132703 | -1.533162901 |
| n26        | TCAAAGTCCCGGTCCCGCCTAAAACCCATTGTGTGGCA | 4             | 6.60803E-07 | 0.354773724  | 4             | 2.70821E-06 | -1.444223753 |
| n27        | TCACAGTCCCGGTCCCGCCTAAAACCCATTGTGTGGCA | 2             | 4.80401E-07 | 0.177386862  | 4             | 2.70821E-06 | -1.444223753 |
| n28        | TCAAAGTCCCGGTCCCGCCTAAAACCCATTGTGTGGCA | 2             | 4.80401E-07 | 0.177386862  | 4             | 2.70821E-06 | -1.444223753 |
| n29        | TCACAGTCCCGGTCCCGCCTAAAACCCATTGTGTGGCA | 2             | 4.80401E-07 | 0.177386862  | 4             | 2.70821E-06 | -1.444223753 |
| n30        | TCACAGTCCCGGTCCCGCCTAAAACCCATTGTGTGGCA | 184           | 4.14369E-05 | 1.388901387  | 47            | 3.18215E-05 | -1.439128166 |
| n31        | TCACAGTCCCGGTCCCGCCTAAAACCCATTGTGTGGCA | 323           | 7.58488E-05 | 1.637027325  | 70            | 4.73937E-05 | -1.244068404 |
| n32        | TCACAGTCCCGGTCCCGCCTAAAACCCATTGTGTGGCA | 2             | 4.80401E-07 | 0.236515816  | 3             | 2.03116E-06 | -1.243820777 |
| n33        | GCACAGTCCCGGTCCCGCCTAAAACCCATTGTGTGGCA | 2             | 4.80401E-07 | 0.236515816  | 3             | 2.03116E-06 | -1.243820777 |
| n34        | GCACAGTCCCGGTCCCGCCTAAAACCCATTGTGTGGCA | 2             | 4.80401E-07 | 0.236515816  | 3             | 2.03116E-06 | -1.243820777 |
| n35        | TCACAGTCCCGGTCCCGCCTAAAACCCATTGTGTGGCA | 194           | 4.65989E-05 | 1.36422296   | 44            | 2.97903E-05 | -1.161984939 |
| n36        | TCACAGTCCCGGTCCCGCCTAAAACCCATTGTGTGGCA | 4             | 6.60803E-07 | 0.709547448  | 2             | 1.35411E-06 | -1.138469215 |
| n37        | TCACAGTCCCGGTCCCGCCTAAAACCCATTGTGTGGCA | 4             | 6.60803E-07 | 0.709547448  | 2             | 1.35411E-06 | -1.138469215 |
| n38        | TCACAGTCCCGGTCCCGCCTAAAACCCATTGTGTGGCA | 4             | 6.60803E-07 | 0.709547448  | 2             | 1.35411E-06 | -1.138469215 |
| n39        | TCACAGTCCCGGTCCCGCCTAAAACCCATTGTGTGGCA | 3             | 7.20602E-07 | 0.532160586  | 2             | 1.35411E-06 | -1.138469215 |
| n40        | GCACAGTCCCGGTCCCGCCTAAAACCCATTGTGTGGCA | 3             | 7.20602E-07 | 0.532160586  | 2             | 1.35411E-06 | -1.138469215 |
| n41        | TCACAGTCCCGGTCCCGCCTAAAACCCATTGTGTGGCA | 3             | 7.20602E-07 | 0.532160586  | 2             | 1.35411E-06 | -1.138469215 |
| n42        | TCACAGTCCCGGTCCCGCCTAAAACCCATTGTGTGGCA | 3             | 7.20602E-07 | 0.532160586  | 2             | 1.35411E-06 | -1.138469215 |
| n43        | TCACAGTCCCGGTCCCGCCTAAAACCCATTGTGTGGCA | 3             | 7.20602E-07 | 0.532160586  | 2             | 1.35411E-06 | -1.138469215 |
| n44        | TCACAGTCCCGGTCCCGCCTAAAACCCATTGTGTGGCA | 3             | 7.20602E-07 | 0.532160586  | 2             | 1.35411E-06 | -1.138469215 |
| n45        | TCACAGTCCCGGTCCCGCCTAAAACCCATTGTGTGGCA | 2             | 4.80401E-07 | 0.354773724  | 2             | 1.35411E-06 | -1.138469215 |
| n46        | GCACAGTCCCGGTCCCGCCTAAAACCCATTGTGTGGCA | 2             | 4.80401E-07 | 0.354773724  | 2             | 1.35411E-06 | -1.138469215 |
| n47        | TCAAAGTCCCGGTCCCGCCTAAAACCCATTGTGTGGCA | 2             | 4.80401E-07 | 0.354773724  | 2             | 1.35411E-06 | -1.138469215 |

## References

- [1] Jan Hoinka, Alexey Berezhnoy, Zuben E Sauna, Eli Gilboa, and Teresa M Przytycka. Aptacluster—a method to cluster ht-selex aptamer pools and lessons from its application. In *Research in Computational Molecular Biology*, pages 115–128. Springer.
- [2] Aristides Gionis, Piotr Indyk, and Rajeev Motwani. *Similarity Search in High Dimensions via Hashing*, page 518–529. VLDB '99. Morgan Kaufmann Publishers Inc., 1999.
